# Supplementary material for: Perfusion and Diffusion Variables Predict Early Neurological Deterioration in Minor Stroke and Large Vessel Occlusion
Source: PubMed Central journal article supplement — J Stroke. 2021 Jan 31;23(1):61–8. doi: 10.5853/jos.2020.01466 (PMC7900396; doi:10.5853/jos.2020.01466), 2021-01-31
Supplement: jos-2020-01466-suppl1.pdf [file jos-2020-01466-suppl1.pdf]

**Supplementary Table 1.** Patients' characteristics by IV tPA status

| Characteristic           | IV tPA (n=28)       | No IV tPA (n=66)    | P      |
|--------------------------|---------------------|---------------------|--------|
| Baseline NIHSS           | 2.04±1.71           | 2.15±1.61           | 0.755  |
| Onset-to-door time (hr)  | 1.33 (0.89–2.20)    | 5.36 (2.38–13.38)   | <0.001 |
| Site of occlusion        |                     |                     | 0.134  |
| Intracranial ICA         | 0 (0)               | 7 (10.6)            |        |
| Tandem                   | 1 (3.6)             | 5 (7.6)             |        |
| MCA M1                   | 12 (42.9)           | 32 (48.5)           |        |
| MCA M2 trunk             | 15 (53.6)           | 22 (33.3)           |        |
| Baseline glucose (mg/dL) | 144.2±53.5          | 143.6±50.9          | 0.963  |
| Initial DWI volume (mL)  | 0.52 (0.00–5.97)    | 1.53 (0.17–5.52)    | 0.380  |
| Tmax >6 sec (mL)         | 40.62 (15.86–57.96) | 25.47 (5.23–52.30)  | 0.383  |
| Tmax >6 sec – DWI (mL)   | 37.42 (12.36–54.64) | 21.79 (3.18–41.37)  | 0.298  |
| Tmax 4–6 sec (mL)        | 35.09 (26.34–83.93) | 51.16 (28.42–81.39) | 0.185  |

Values are presented as mean±standard deviation, median (interquartile range), or number (%).

IV tPA, intravenous tissue-type plasminogen activator; NIHSS, National Institutes of Health Stroke Scale; ICA, internal carotid artery; MCA, middle cerebral artery; DWI, diffusion-weighted imaging.
