# Supplementary material for: Perfusion and Diffusion Variables Predict Early Neurological Deterioration in Minor Stroke and Large Vessel Occlusion
Source: PubMed Central journal article supplement — J Stroke. 2021 Jan 31;23(1):61–8. doi: 10.5853/jos.2020.01466 (PMC7900396; doi:10.5853/jos.2020.01466), 2021-01-31
Supplement: jos-2020-01466-suppl2.pdf [file jos-2020-01466-suppl2.pdf]

**Supplementary Table 2.** Baseline demographics of enrolled patients and patients who underwent EVT before END

| Variable                       | Enrolled patients (n=94) | Excluded patients: EVT before END (n=14) | P      |
|--------------------------------|--------------------------|------------------------------------------|--------|
| Age (yr)                       | 66.9±13.0                | 67.5±15.0                                | 0.887  |
| Men                            | 49 (52.1)                | 10 (71.4)                                | 0.176  |
| Baseline NIHSS                 | 2.12±1.63                | 3.93±1.49                                | <0.001 |
| Onset-to-door time (hr)        | 3.23 (1.45–9.33)         | 2.93 (0.65–5.00)                         | 0.141  |
| Pre-stroke mRS                 |                          |                                          | 1.000  |
| 0                              | 80 (85.1)                | 12 (85.7)                                |        |
| 1                              | 14 (14.9)                | 2 (14.3)                                 |        |
| Stroke mechanism               |                          |                                          | 0.705  |
| LAA                            | 42 (44.7)                | 5 (35.7)                                 |        |
| CE                             | 36 (38.3)                | 7 (50.0)                                 |        |
| Other determined               | 0 (0)                    | 0 (0)                                    |        |
| Undetermined                   | 16 (17.0)                | 2 (14.3)                                 |        |
| Site of occlusion              |                          |                                          | 0.020  |
| Intracranial ICA               | 7 (7.4)                  | 0 (0.0)                                  |        |
| Tandem                         | 6 (6.4)                  | 3 (21.4)                                 |        |
| MCA M1                         | 44 (46.8)                | 10 (71.4)                                |        |
| MCA M2 trunk                   | 37 (39.4)                | 1 (7.1)                                  |        |
| Hypertension                   | 63 (67.0)                | 9 (64.3)                                 | 1.000  |
| Diabetes mellitus              | 25 (26.6)                | 3 (21.4)                                 | 1.000  |
| Hyperlipidemia                 | 37 (39.4)                | 4 (28.6)                                 | 0.438  |
| Atrial fibrillation            | 26 (27.7)                | 5 (35.7)                                 | 0.538  |
| MI or angina                   | 9 (9.6)                  | 1 (7.1)                                  | 1.000  |
| Prior stroke                   | 11 (11.7)                | 2 (14.3)                                 | 0.675  |
| Smoking                        | 19 (20.2)                | 4 (28.6)                                 | 0.491  |
| SBP (mm Hg)                    | 157.2±31.1               | 160.0±35.4                               | 0.869  |
| DBP (mm Hg)                    | 86.57±17.0               | 88.9±12.4                                | 0.699  |
| Leukocyte count (n/μL)         | 8,075.1±2,324.8          | 8,581.4±3,376.1                          | 0.883  |
| Hemoglobin (g/dL)              | 13.7±1.5                 | 12.9±3.5                                 | 0.998  |
| Hematocrit (%)                 | 39.9±4.1                 | 39.5±4.1                                 | 0.855  |
| Platelet count (n/μL)          | 245,053±74,857           | 209,143±58,010                           | 0.075  |
| ESR (mm/hr)                    | 10.0 (5.0–19.0)          | 5.0 (2.0–12.5)                           | 0.036  |
| CRP (mg/dL)                    | 0.25 (0.08–0.34)         | 0.16 (0.09–0.30)                         | 0.922  |
| Fibrinogen (mg/dL)             | 287.2±82.7               | 268.3±66.8                               | 0.539  |
| Baseline glucose (mg/dL)       | 143.8±51.4               | 149.0±75.0                               | 0.991  |
| Type of recanalization therapy |                          |                                          |        |
| IV tPA                         | 28 (29.8)                | 4 (28.6)                                 | 1.000  |
| Rescue EVT                     | 23 (24.5)                | 14 (100.0)                               | <0.001 |

Values are presented as mean±standard deviation, number (%), or median (interquartile range).

EVT, endovascular therapy; END, early neurological deterioration; NIHSS, National Institutes of Health Stroke Scale; mRS, modified Rankin Scale; LAA, large artery atherosclerosis; CE, cardioembolism; ICA, internal carotid artery; MCA, middle cerebral artery; MI, myocardial infarction; SBP, systolic blood pressure; DBP, diastolic blood pressure; ESR, erythrocyte sedimentation rate; CRP, C-reactive protein; IV tPA, intravenous tissue-type plasminogen activator.
