# Supplementary material for: Perfusion and Diffusion Variables Predict Early Neurological Deterioration in Minor Stroke and Large Vessel Occlusion
Source: PubMed Central journal article supplement — J Stroke. 2021 Jan 31;23(1):61–8. doi: 10.5853/jos.2020.01466 (PMC7900396; doi:10.5853/jos.2020.01466), 2021-01-31
Supplement: jos-2020-01466-suppl3.pdf [file jos-2020-01466-suppl3.pdf]

**Supplementary Table 3.** Imaging variables of enrolled patients and patients who underwent EVT before END

| Variable                | Enrolled patients (n=94) | Excluded patients: EVT before END* | P     |
|-------------------------|--------------------------|------------------------------------|-------|
| Initial DWI volume (mL) | 1.34 (0.00–5.61)         | 3.45 (1.46–7.80)                   | 0.065 |
| Tmax >2 sec (mL)        | 217.62 (156.56–274.25)   | 273.00 (215.14–357.00)             | 0.044 |
| Tmax >4 sec (mL)        | 84.24 (47.78–120.57)     | 128.65 (77.16–208.59)              | 0.013 |
| Tmax >6 sec (mL)        | 28.97 (10.15–56.67)      | 62.33 (28.81–131.16)               | 0.018 |
| Tmax >8 sec (mL)        | 12.53 (0.00–25.10)       | 32.46 (3.47–77.81)                 | 0.080 |
| Tmax >10 sec (mL)       | 3.85 (0.00–12.70)        | 16.41 (0.00–45.91)                 | 0.082 |
| Tmax >4 sec – DWI (mL)  | 75.21 (43.27–118.17)     | 128.65 (72.89–206.64)              | 0.017 |
| Tmax >6 sec – DWI (mL)  | 24.96 (6.45–46.25)       | 51.98 (25.61–129.21)               | 0.024 |
| Tmax 2–6 sec (mL)       | 185.54 (131.62–229.11)   | 198.23 (154.99–233.46)             | 0.709 |
| Tmax 4–6 sec (mL)       | 47.19 (28.10–76.63)      | 60.11 (45.70–76.88)                | 0.353 |

Values are presented as median (interquartile range).

EVT, endovascular therapy; END, early neurological deterioration; DWI, diffusion-weighted imaging.

\*Of the 14 excluded patients who received EVT before END, those who had missing data on DWI (n=1) and perfusion variables (n=5) were excluded from the corresponding analysis.
