# Supplementary material for: Perfusion and Diffusion Variables Predict Early Neurological Deterioration in Minor Stroke and Large Vessel Occlusion
Source: PubMed Central journal article supplement — J Stroke. 2021 Jan 31;23(1):61–8. doi: 10.5853/jos.2020.01466 (PMC7900396; doi:10.5853/jos.2020.01466), 2021-01-31
Supplement: jos-2020-01466-suppl4.pdf [file jos-2020-01466-suppl4.pdf]

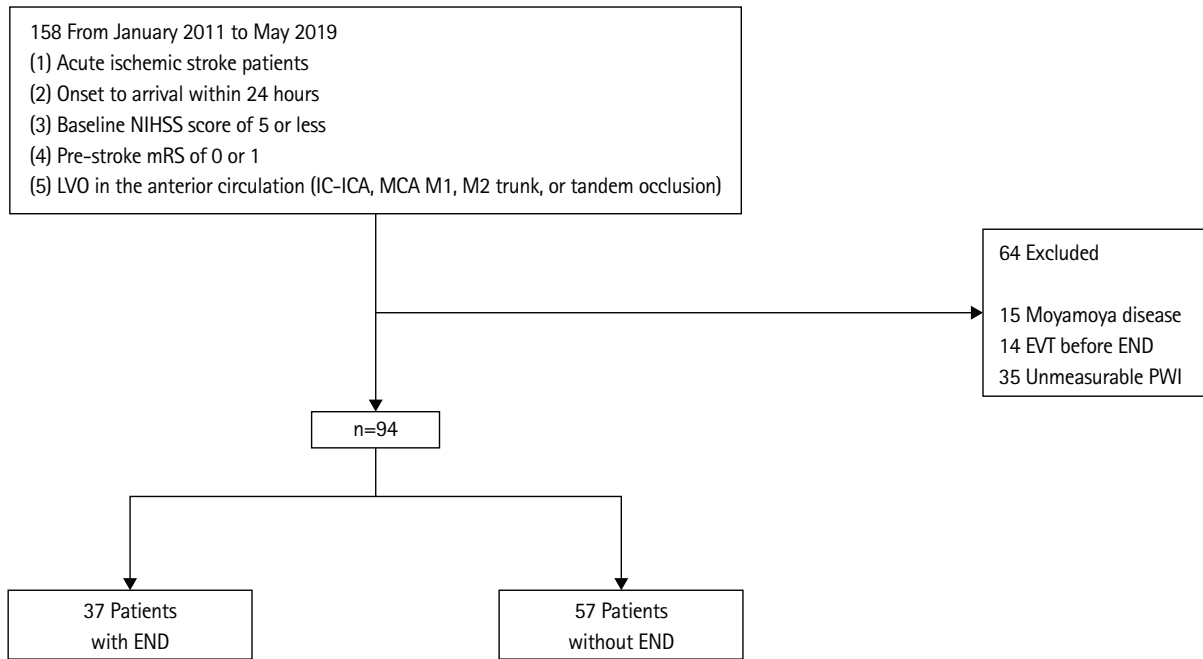

**Supplementary Figure 1.** Flowchart of patient screening and enrollment. NIHSS, National Institutes of Health Stroke Scale; mRS, modified Rankin Scale; LVO, large vessel occlusion; IC-ICA, intracranial internal carotid artery; MCA, middle cerebral artery; EVT, endovascular treatment; END, early neurological deterioration; PWI, perfusion-weighted imaging.
